# Supplementary material for: Assessing the Risk of Dengue Virus Local Transmission: Study on Vector Competence of Italian Aedes albopictus
Source: MDPI journal article supplement (doi:10.3390/v16020176), 2024-01-24
Supplement: s1 [file s1]

Alignment: C:\Users\claud\OneDrive\Desktop\seqdump.txt

```

      ....|....|  ....|....|  ....|....|  ....|....|  ....|....|
      10          20          30          40          50
MZ291446.1 TTTCGAATCG GAAGCTTGCT TAACGTAGTT CTGACAGTTT TTTATTAGAG
MG097876.1 TTTCGAATCG GAAGCTTGCT TAACGTAGTT CTGACAGTTT TTTATTAGAG

      ....|....|  ....|....|  ....|....|  ....|....|  ....|....|
      60          70          80          90         100
MZ291446.1 AGCAGATCTC TGATGAACAA CCAACGAAAA AAGACGGCTC GACCGTCTTT
MG097876.1 AGCAGATCTC TGATGAACAA CCAACGAAAA AAGACGGCTC GACCGTCTTT

      ....|....|  ....|....|  ....|....|  ....|....|  ....|....|
     110         120         130         140         150
MZ291446.1 CAATATGCTG AAACGCGCGA GAAACCGCGT GTCAACTGTT TCACAGTTGG
MG097876.1 CAATATGCTG AAACGCGCGA GAAACCGCGT GTCAACTGTT TCACAGTTGG

      ....|....|  ....|....|  ....|....|  ....|....|  ....|....|
     160         170         180         190         200
MZ291446.1 CGAAGAGATT CTCAAAAGGA TTGCTCTCAG GCCAAGGACC CATGAAACTG
MG097876.1 CGAAGAGATT CTCAAAAGGA TTGCTCTCAG GCCAAGGACC CATGAAACTG

      ....|....|  ....|....|  ....|....|  ....|....|  ....|....|
     210         220         230         240         250
MZ291446.1 GTGATGGCTT TCATAGCATT CCTAAGATTT CTAGCCATAC CCCCACAGC
MG097876.1 GTGATGGCTT TCATAGCATT CCTAAGATTT CTAGCCATAC CCCCACAGC

      ....|....|  ....|....|  ....|....|  ....|....|  ....|....|
     260         270         280         290         300
MZ291446.1 AGGAATTTTG GCTAGATGGG GCTCATTCAA GAAGAATGGA GCGATCAAAG
MG097876.1 AGGAATTTTG GCTAGATGGG GTTCATTCAA GAAGAATGGA GCGATCAAAG

      ....|....|  ....|....|  ....|....|  ....|....|  ....|....|
     310         320         330         340         350
MZ291446.1 TGCTACGGGG TTTCAAGAAA GAAATCTCAA GCATGTTGAA CATAATGAAT
MG097876.1 TGCTACGGGG TTTCAAGAAA GAAATCTCAA GCATGTTGAA TATAATGAAT

      ....|....|  ....|....|  ....|....|  ....|....|  ....|....|
     360         370         380         390         400
MZ291446.1 AGAAGGAAAA GATCTGTGAC CATGCTCCTT ATGCTGATGC CTACAGCCTT
MG097876.1 AGAAGGAAAA GATCTGTGAC CATGCTCCTT ATGCTGATGC CTACAGCCTT

      ....|....|  ....|....|  ....|....|  ....|....|  ....|....|
     410         420         430         440         450
MZ291446.1 GGCATTCCAT TTGACTACAC GAGGGGGAGA GCCGCACATG ATAGTCAGCA
MG097876.1 GGCATTCCAT TTGACTACAC GAGGGGGAGA GCCGCACATG ATAGTCAGCA

      ....|....|  ....|....|  ....|....|  ....|....|  ....|....|
     460         470         480         490         500
MZ291446.1 AGCAGGAAAG AGGAAAGTCA CTTTGTGTTA AGACCTCAGC AGGTGTCAAT
MG097876.1 AGCAGGAAAG AGGAAAGTCT CTTTGTGTTA AGACCTCAGC AGGTGTCAAC

      ....|....|  ....|....|  ....|....|  ....|....|  ....|....|
     510         520         530         540         550
MZ291446.1 ATGTGCACCC TCATAGCGAT GGATTTGGGA GAGTTATGTG AGGACACAAT
MG097876.1 ATGTGCACCC TTATAGCGAT GGATTTGGGA GAGTTATGTG AGGACACAAT

      ....|....|  ....|....|  ....|....|  ....|....|  ....|....|
     560         570         580         590         600
MZ291446.1 GACTTACAAA TGCCCTCGAA TCACTGAGGC GGAACCAGAT GACGTTGATT
MG097876.1 GACTTACAAA TGCCCTCGAA TCACTGAGGC GGAACCAGAT GACGTTGATT
```

.....|.....|.....|.....|.....|.....|.....|.....|.....|.....|  
610620630640650

MZ291446.1GTTGGTGCAA TGCCACAGAC ACATGGGTGA CCTATGGAAC ATGTTCCCAA  
MG097876.1GTTGGTGCAA TGCCACAGAC ACATGGGTGA CCTATGGAAC ATGTTCCCAA

.....|.....|.....|.....|.....|.....|.....|.....|.....|.....|  
660670680690700

MZ291446.1ACTGGCGAGC ACCGACGAGA CAAACGTTCC GTTGCACTGG CACCACACGT  
MG097876.1ACTGGCGAGC ACCGACGAGA CAAACGTTCC GTCGCACTGG CCCCACACGT

.....|.....|.....|.....|.....|.....|.....|.....|.....|.....|  
710720730740750

MZ291446.1GGGACTTGGT TTGGAAACAA GAACTGAAAC GTGGATGTCC TCTGAAGGCG  
MG097876.1GGGACTTGGT TTGGAAACAA GAACCGAAAC GTGGATGTCC TCCGAAGGAG

.....|.....|.....|.....|.....|.....|.....|.....|.....|.....|  
760770780790800

MZ291446.1CTTGGAACA GATACAAAGA GTGGAGACTT GGGCCCTGAG ACACCCAGGA  
MG097876.1CTTGGAACA GATACAAAGA GTGGAGACTT GGGCCCTGAG ACACCCAGGA

.....|.....|.....|.....|.....|.....|.....|.....|.....|.....|  
810820830840850

MZ291446.1TTCACGGTGA TAGCCCTTTT TCTAGCACAT GCCATAGGAA CATCCATCAC  
MG097876.1TTCACGGCGA TAGCCCTTTT TTTAGCACAT GCCATAGGAA CATCCATCAC

.....|.....|.....|.....|.....|.....|.....|.....|.....|.....|  
860870880890900

MZ291446.1CCAGAAAGGG ATTATCTTCA TTTTGTTAAT GCTGGTTACA CCATCTATGG  
MG097876.1CCAGAAAGGG ATTATCTTCA TTTTGTTAAT GCTGGTTACA CCATCCATGG

.....|.....|.....|.....|.....|.....|.....|.....|.....|.....|  
910920930940950

MZ291446.1CCATGCGATG CGTGGGAATA GGCAGCAGGG ACTTCGTGGA AGGACTGTCA  
MG097876.1CCATGCGATG CGTGGGAATA GGCAGCAGGG ACTTCGTGGA AGGACTGTCA

.....|.....|.....|.....|.....|.....|.....|.....|.....|.....|  
9609709809901000

MZ291446.1GGAGCAACTT GGGTAGATGT GGTGTTGGAA CATGGAAGTT GCGTCACTAC  
MG097876.1GGAGCAACTT GGGTAGATGT GGTGTTGGAA CATGGAAGTT GCGTTACTAC

.....|.....|.....|.....|.....|.....|.....|.....|.....|.....|  
10101020103010401050

MZ291446.1CATGGCAAAA GACAAACCAA CATTGGACAT TGAACCTTG AAGACGGAAG  
MG097876.1CATGGCAAAA GATAAACCAA CATTGGACAT TGAACCTTG AAGACGGAAG

.....|.....|.....|.....|.....|.....|.....|.....|.....|.....|  
10601070108010901100

MZ291446.1TCACAAACCC TGCCGTCTTG CGCAAACCTGT GCATTGAAGC TAAAATATCA  
MG097876.1TCACAAACCC TGCCGTCTTG CGCAAACCTGT GCATTGAAGC TAAAATATCA

.....|.....|.....|.....|.....|.....|.....|.....|.....|.....|  
11101120113011401150

MZ291446.1AACACCACCA CTGACTCAAG ATGTCCAACA CAAGGAGAAG CCACACTGGT  
MG097876.1AACACCACCA CCGACTCAAG ATGTCCAACA CAAGGAGAAG CCACATTGGT

.....|.....|.....|.....|.....|.....|.....|.....|.....|.....|  
11601170118011901200

MZ291446.1GGAAGAACAA GACGCGAACT TTGTGTGTGCG ACGAACGTTT GTGGACAGAG  
MG097876.1GGAAGAACAA GACGCGAACT TTGTGTGTGCG ACGAACGTTT GTGGACAGAG

.....|.....|.....|.....|.....|.....|.....|.....|.....|.....|  
12101220123012401250  
MZ291446.1GCTGGGGCAA TGGATGTGGG CTCTTCGGAA AAGGAAGCCT TATAACGTGT  
MG097876.1GCTGGGGCAA TGGCTGTGGG CTTTTCGGAA AAGGAAGCCT TATAACGTGT

.....|.....|.....|.....|.....|.....|.....|.....|.....|.....|  
12601270128012901300  
MZ291446.1GCCAAGTTCA AGTGTGTGAC AAAACTGGAA GGAAAAATAG TTCAATATGA  
MG097876.1GCTAAGTTCA AGTGTGTGAC AAAACTGGAA GGAAAAATAG TTCAATATGA

.....|.....|.....|.....|.....|.....|.....|.....|.....|.....|  
13101320133013401350  
MZ291446.1AAACTTGAAA TATTTCAGTAA TAGTCACCGT CCACACTGGA GACCAGCACC  
MG097876.1AAACTTGAAA TATTTCAGTAA TAGTCACCGT CCACACTGGA GACCAGCACC

.....|.....|.....|.....|.....|.....|.....|.....|.....|.....|  
13601370138013901400  
MZ291446.1AGGTGGGAAA TGAAAGCACA GAACATGGGA CAACTGCAAC CATAACACCT  
MG097876.1AGGTGGGAAA TGAAAGCACA GAACATGGGA CAACTGCAAC CATAACACCT

.....|.....|.....|.....|.....|.....|.....|.....|.....|.....|  
14101420143014401450  
MZ291446.1CAAGCTCCTA CGACAGAAAT ACAGCTGACC GACTACGGAG CTCTCACATT  
MG097876.1CAAGCTCCTA CGACAGAAAT ACAGCTGACC GACTACGGAG CTCTTACATT

.....|.....|.....|.....|.....|.....|.....|.....|.....|.....|  
14601470148014901500  
MZ291446.1GGATTGTTCA CCTAGAACAG GACTGGACTT CAATGAAATG GTGTTGTTGA  
MG097876.1GGATTGTTCA CCTAGAACAG GACTGGACTT CAATGAAATG GTGTTGTTGA

.....|.....|.....|.....|.....|.....|.....|.....|.....|.....|  
15101520153015401550  
MZ291446.1CAATGAAAGA AAAGTCATGG CTAGTCCACA AACAATGGTT CCTAGACCTA  
MG097876.1CAATGAAAGA AAAGTCATGG CTAGTCCACA AACAATGGTT TCTAGACCTA

.....|.....|.....|.....|.....|.....|.....|.....|.....|.....|  
15601570158015901600  
MZ291446.1CCACTGCCTT GGACCTCGGG AGCTTCAACA TTACAAGAAA CTTGGAACAG  
MG097876.1CCACTGCCTT GGACCTCGGG AGCTTCAACA TCACAAGAAA CTTGGAACAG

.....|.....|.....|.....|.....|.....|.....|.....|.....|.....|  
16101620163016401650  
MZ291446.1ACAAGATTTG CTGGTGACAT TTAAGACAGC TCATGCAAAG AAGCAGGAAG  
MG097876.1ACAAGATTTG CTGGTGACAT TTAAGACAGC TCATGCAAAG AAGCAGGAAG

.....|.....|.....|.....|.....|.....|.....|.....|.....|.....|  
16601670168016901700  
MZ291446.1TAGTCGTACT AGGATCACAA GAAGGAGCAA TGCACACTGC GTTGACCGGA  
MG097876.1TAGTCGTACT AGGATCACAA GAAGGAGCAA TGCACACTGC GTTGACCGGA

.....|.....|.....|.....|.....|.....|.....|.....|.....|.....|  
17101720173017401750  
MZ291446.1GCGACGGAAT TCCAAACGTC TGGAACGACA ACAATTTTGT CAGGACACTT  
MG097876.1GCGACGGAAT TCCAAACGTC TGGAACGACA ACAATTTTGT CAGGACACTT

.....|.....|.....|.....|.....|.....|.....|.....|.....|.....|  
17601770178017901800  
MZ291446.1GAAATGTAGA CTAAAGATGG ACAAACTGAC TCTAAAAGGG ATGTCATATG  
MG097876.1GAAATGTAGA TTAAAGATGG ACAAACTGAC TCTAAAAGGG ATGTCATATG

.....|.....|.....|.....|.....|.....|.....|.....|  
18101820183018401850  
MZ291446.1TGATGTGCACAGGCTCATTC AAGCTAGAGA AAGAAAGTGGC TGAGACCCAG  
MG097876.1TGATGTGCACAGGCTCATTC AAGCTAGAGA AAGAAAGTGGC TGAGACCCAG

.....|.....|.....|.....|.....|.....|.....|.....|  
18601870188018901900  
MZ291446.1CATGGAACCGTTCTAGTGCA GATTAAATAC GAAGGAGCAG ATGCACCATG  
MG097876.1CATGGAACCGTTCTAGTGCA GATTAAATAC GAAGGAACAG ATGCACCATG

.....|.....|.....|.....|.....|.....|.....|.....|  
19101920193019401950  
MZ291446.1CAAGATCCCTTTTTCGACCC AAGATGAAAA AGGAGTAACC CAGAATGGGA  
MG097876.1CAAGATCCCTTTTTTGACCC AAGATGAAAA AGGAGTAACC CAGAATGGGA

.....|.....|.....|.....|.....|.....|.....|.....|  
19601970198019902000  
MZ291446.1GATTGATAACAGCCAACCCC ATAGTCACTG ACAAAGAAAA ACCAGTCAAC  
MG097876.1GATTGATAACAGCCAACCCC ATAGTCTCTG ACAAAGAAAA ACCAGTCAAC

.....|.....|.....|.....|.....|.....|.....|.....|  
20102020203020402050  
MZ291446.1ATTGAGGCAGAACCGCCTTT TGGTGAGAGT TATATCGTGA TAGGAGCAGG  
MG097876.1ATTGAGGCAGAACCGCCTTT TGGTGAGAGT TACATCGTGA TAGGAGCAGG

.....|.....|.....|.....|.....|.....|.....|.....|  
20602070208020902100  
MZ291446.1TGAAAAGGCTTTGAAACTAA GCTGGTTCAA GAAAGGAAGC AGCATAGGGA  
MG097876.1TGAAAAGCTTTGAAACTAA GCTGGTTCAA GAAAGGAAGC AGCATAGGGA

.....|.....|.....|.....|.....|.....|.....|.....|  
21102120213021402150  
MZ291446.1AAATGTTTGA GGCAACTGCC AGAGGAGCAC GAAGGATGGC CATACTGGGA  
MG097876.1AAATGTTTGA GGCAACTGCC AGAGGAGCAC GAAGGATGGC CATACTGGGA

.....|.....|.....|.....|.....|.....|.....|.....|  
21602170218021902200  
MZ291446.1GACACCGCATGGGACTTTGG TTCTATAGGA GGAGTGTTCA CGTCTGTTGG  
MG097876.1GACACCGCATGGGACTTTGG TTCTATAGGA GGAGTGTTCA CGTCTGTTGG

.....|.....|.....|.....|.....|.....|.....|.....|  
22102220223022402250  
MZ291446.1AAAAGTAGTACACCAGATTT TTGGAAGTGC ATATGGAGTT TTGTTAGCG  
MG097876.1AAAATTAGTACACCAGATTT TTGGAAGTGC ATATGGAGTT TTGTTAGCG

.....|.....|.....|.....|.....|.....|.....|.....|  
22602270228022902300  
MZ291446.1GTGTTTCCTG GACCATGAAA ATAGGAATAG GGGTTCTGCT GACATGGCTA  
MG097876.1GTGTTTCCTG GACCATGAAA ATAGGAATAG GGGTTCTGCT GACATGGCTA

.....|.....|.....|.....|.....|.....|.....|.....|  
23102320233023402350  
MZ291446.1GGATTAAACTCAAGGAGCAC GTCCCTTTTCG ATGACGTGCA TTGCAGTCGG  
MG097876.1GGATTAAACTCAAGGAGCAC GTCCCTTTTCG ATGACGTGCA TTGCAGTTGG

.....|.....|.....|.....|.....|.....|.....|.....|  
23602370238023902400  
MZ291446.1CCTAGTAACGCTATACTTAG GAGTCATGGT TCAGGCGGAT TCAGGATGTG  
MG097876.1CCTAGTAACGCTATACTTAG GAGTCATGGT TCAGGCGGAT TCAGGATGTG

.....|.....|.....|.....|.....|.....|.....|.....|

|            |             |             |             |             |             |
|------------|-------------|-------------|-------------|-------------|-------------|
|            | 2410        | 2420        | 2430        | 2440        | 2450        |
| MZ291446.1 | TAATCAATTG  | GAAAGGTAGA  | GAAGTCAAAT  | GTGGGAGTGG  | CATTTTTTGT  |
| MG097876.1 | TAATTAATTG  | GAAAGGTAGA  | GAAGTCAAAT  | GTGGAAGTGG  | CATTTTTTGT  |
|            | ..... ..... | ..... ..... | ..... ..... | ..... ..... | ..... ..... |
|            | 2460        | 2470        | 2480        | 2490        | 2500        |
| MZ291446.1 | ACTAATGAAG  | TTCACACTTG  | GACAGAGCAA  | TACAAATTTT  | AAGCTGATTC  |
| MG097876.1 | ACCAATGAAG  | TTCACACTTG  | GACAGAGCAA  | TACAAATTTT  | AAGCTGATTC  |
|            | ..... ..... | ..... ..... | ..... ..... | ..... ..... | ..... ..... |
|            | 2510        | 2520        | 2530        | 2540        | 2550        |
| MZ291446.1 | CCCAAAGAGA  | CTATCAGCAG  | CCATTGGGAA  | GGCATGGGAG  | GAGGGTGTGT  |
| MG097876.1 | CCCAAAGAGA  | TTATCAGCAG  | CCATTGGGAA  | GGCATGGGAG  | GAGGGTGTGT  |
|            | ..... ..... | ..... ..... | ..... ..... | ..... ..... | ..... ..... |
|            | 2560        | 2570        | 2580        | 2590        | 2600        |
| MZ291446.1 | GTGGAATTCG  | ATCAGCAACC  | CGTCTCGAGA  | ACATCATGTG  | GAAGCAAATA  |
| MG097876.1 | GTGGAATTCG  | ATCAGCAACT  | CGTCTCGAGA  | ACATCATGTG  | GAAGCAAATA  |
|            | ..... ..... | ..... ..... | ..... ..... | ..... ..... | ..... ..... |
|            | 2610        | 2620        | 2630        | 2640        | 2650        |
| MZ291446.1 | TCAAATGAAT  | TGAACCACAT  | CTTGCTTGAA  | AATGACATGA  | AATTCACAGT  |
| MG097876.1 | TCAAATGAAT  | TGAACCACAT  | CTTGCTTGAA  | AATGACATGA  | AATTTACAGT  |
|            | ..... ..... | ..... ..... | ..... ..... | ..... ..... | ..... ..... |
|            | 2660        | 2670        | 2680        | 2690        | 2700        |
| MZ291446.1 | GGTTGTAGGA  | GATGTTGCTG  | GGATCTTGGC  | TCAAGGGAAA  | AAAATGATTA  |
| MG097876.1 | GGTTGTAGGA  | GATGTTGCTG  | GGATCTTGGC  | TCAAGGAAAA  | AAGATGATTA  |
|            | ..... ..... | ..... ..... | ..... ..... | ..... ..... | ..... ..... |
|            | 2710        | 2720        | 2730        | 2740        | 2750        |
| MZ291446.1 | GGCCACAACC  | CATGGAACAC  | AAATACTCGT  | GGAAAAGCTG  | GGGAAAAGCT  |
| MG097876.1 | GGCCACAACC  | CATGGAACAC  | AAATACTCGT  | GGAAAAGCTG  | GGGAAAAGCT  |
|            | ..... ..... | ..... ..... | ..... ..... | ..... ..... | ..... ..... |
|            | 2760        | 2770        | 2780        | 2790        | 2800        |
| MZ291446.1 | AAAATCATAG  | GGGCAGATGT  | ACAGAACACC  | ACCTTTTATCA | TCGACGGCCC  |
| MG097876.1 | AAAATCATAG  | GGGCAGATGT  | ACAGAACACC  | ACCTTTTATCA | TCGACGGCCC  |
|            | ..... ..... | ..... ..... | ..... ..... | ..... ..... | ..... ..... |
|            | 2810        | 2820        | 2830        | 2840        | 2850        |
| MZ291446.1 | AAACACCCCA  | GAATGCCCTG  | ATGATCAAAG  | AGCATGGAAC  | ATTTGGGAAG  |
| MG097876.1 | AAACACCCCA  | GAATGCCCTG  | ATGATCAAAG  | AGCATGGAAC  | ATTTGGGAAG  |
|            | ..... ..... | ..... ..... | ..... ..... | ..... ..... | ..... ..... |
|            | 2860        | 2870        | 2880        | 2890        | 2900        |
| MZ291446.1 | TTGAGGATTA  | TGGATTTGGA  | ATTTTCACGA  | CAAACATATG  | GCTGAAATTG  |
| MG097876.1 | TTGAAGATTA  | TGGATTTGGA  | ATTTTCACGA  | CAAACATATG  | GCTGAAATTG  |
|            | ..... ..... | ..... ..... | ..... ..... | ..... ..... | ..... ..... |
|            | 2910        | 2920        | 2930        | 2940        | 2950        |
| MZ291446.1 | CGTGACTCCT  | ACACCCAAGT  | GTGTGACCAC  | CGGCTAATGT  | CAGCTGCCAT  |
| MG097876.1 | CGCGACTCCT  | ACACCCAAGT  | GTGTGACCAC  | CGGCTAATGT  | CAGCTGCCAT  |
|            | ..... ..... | ..... ..... | ..... ..... | ..... ..... | ..... ..... |
|            | 2960        | 2970        | 2980        | 2990        | 3000        |
| MZ291446.1 | CAAAGACAGC  | AAGGCAGTTC  | ATGCTGACAT  | GGGGTACTGG  | ATAGAAAAGT  |
| MG097876.1 | CAAGGACAGC  | AAGGCAGTTC  | ACGCTGACAT  | GGGGTACTGG  | ATAGAAAAGT  |
|            | ..... ..... | ..... ..... | ..... ..... | ..... ..... | ..... ..... |
|            | 3010        | 3020        | 3030        | 3040        | 3050        |

MZ291446.1  
MG097876.1

AAAAGAATGA GACCTGGAAG CTGGCAAGAG CCTCTTTCAT AGAAGTCAAA  
AAAAGAACGA GACCTGGAAG CTGGCAAGAG CCTCTTTCAT AGAAGTCAAA

.....|.....| .....|.....| .....|.....| .....|.....| .....|.....|  
3060 3070 3080 3090 3100

MZ291446.1  
MG097876.1

ACGTGTATCT GGCCAAAATC TCACACTCTA TGGAGCAATG GAGTTCTGGA  
ACATGTATCT GGCCAAAATC TCACACTCTA TGGAGCAATG GAGTTCTGGA

.....|.....| .....|.....| .....|.....| .....|.....| .....|.....|  
3110 3120 3130 3140 3150

MZ291446.1  
MG097876.1

AAGTGAAATG ATAATTCCAA AGATCTATGG AGGACCAATA TCTCAGCACA  
AAGTGAAATG ATAATTCCAA AGATCTATGG AGGACCAATA TCTCAGCACA

.....|.....| .....|.....| .....|.....| .....|.....| .....|.....|  
3160 3170 3180 3190 3200

MZ291446.1  
MG097876.1

ACTACAGACC AGGATATTTT ACACAAACGG CAGGGCCGTG GCATCTAGGC  
ACTACAGACC AGGATATTTT ACACAAACGG CAGGGCCGTG GCACCTAGGC

.....|.....| .....|.....| .....|.....| .....|.....| .....|.....|  
3210 3220 3230 3240 3250

MZ291446.1  
MG097876.1

AAGTTGGAAC TGGATTTTGA TTTGTGTGAG GGAACCACGG TTGTTGTGGA  
AAGTTGGAAC TGGATTTTGA TTTGTGTGAG GGTACCACGG TTGTTGTGGA

.....|.....| .....|.....| .....|.....| .....|.....| .....|.....|  
3260 3270 3280 3290 3300

MZ291446.1  
MG097876.1

TGAACATTGT GGAAATCGAG GACCATCTCT TAGGACCACA ACAGTCACAG  
TGAACATTGT GGAAATCGAG GACCATCTCT TAGGACCACA ACAGTCACAG

.....|.....| .....|.....| .....|.....| .....|.....| .....|.....|  
3310 3320 3330 3340 3350

MZ291446.1  
MG097876.1

GAAAGATAAT TCATGAATGG TGTTGCAGAT CTTGTACGCT ACCACCCTTA  
GAAAGATAAT TCATGAATGG TGTTGCAGAT CTTGTACGCT ACCACCCTTA

.....|.....| .....|.....| .....|.....| .....|.....| .....|.....|  
3360 3370 3380 3390 3400

MZ291446.1  
MG097876.1

CGTTTCAGAG GAGAAGATGG GTGCTGGTAC GGTATGGAAA TCAGACCAGT  
CGTTTCAGAG GAGAAGATGG GTGCTGGTAC GGTATGGAAA TCAGACCAGT

.....|.....| .....|.....| .....|.....| .....|.....| .....|.....|  
3410 3420 3430 3440 3450

MZ291446.1  
MG097876.1

CAAGGAAAAG GAAGAGAATC TAGTCAAATC AATGGTCTCT GCAGGGTCAG  
CAAGGAAAAG GAAGAGAATC TAGTCAAATC AATGGTCTCT GCAGGGTCAG

.....|.....| .....|.....| .....|.....| .....|.....| .....|.....|  
3460 3470 3480 3490 3500

MZ291446.1  
MG097876.1

GGGAAGTGGA CAGCTTTTCA CTAGGACTGT TATGCATATC AATAATGATC  
GGGAAGTGGA CAGCTTTTCA CTAGGACTGT TATGCATATC AATAATGATC

.....|.....| .....|.....| .....|.....| .....|.....| .....|.....|  
3510 3520 3530 3540 3550

MZ291446.1  
MG097876.1

GAAGAGGTGA TGAGATCCAG ATGGAGTAGA AAAATGCTGA TGA CTGGAAT  
GAAGAGGTGA TGAGATCCAG ATGGAGTAGA AAAATGCTGA TGA CTGGAAC

.....|.....| .....|.....| .....|.....| .....|.....| .....|.....|  
3560 3570 3580 3590 3600

MZ291446.1  
MG097876.1

ACTGGCTGTG TTCTTCCTTC TCATAATGGG ACAATTGACA TGG AATGATC  
ACTGGCTGTG TTCTTCCTTC TCATAATGGG ACAACTGACA TGG AATGATC

.....|.....| .....|.....| .....|.....| .....|.....| .....|.....|  
3610 3620 3630 3640 3650

MZ291446.1

TGATCAGATT ATGCATCATG GTTGGAGCCA ACGCTTCCGA CAGGATGGGG

MG097876.1 TGATTAGATT ATGCATCATG GTTGGAGCCA ACGCTTCCGA CAGGATGGGG

.....|.....|.....|.....|.....|.....|.....|.....|.....|.....|  
3660 3670 3680 3690 3700

MZ291446.1 ATGGGAACGA CCTACCTAGC TCTGATGGCT ACTTTTAAAA TGAGACCAAT  
MG097876.1 ATGGGAACGA CGTACCTAGC TCTGATGGCC ACTTTTAAAA TGAGACCAAT

.....|.....|.....|.....|.....|.....|.....|.....|.....|.....|  
3710 3720 3730 3740 3750

MZ291446.1 GTTTGCCGTA GGGCTACTAT TCCGCAGACT AACATCCAGA GAAGTTCTTC  
MG097876.1 GTTTGCCGTA GGGCTACTAT TCCGCAGACT AACATCCAGA GAAGTTCTTC

.....|.....|.....|.....|.....|.....|.....|.....|.....|.....|  
3760 3770 3780 3790 3800

MZ291446.1 TTCTAACAAT TGGATTGAGT CTAGTGGCAT CTGTGGAGTT ACCAAATTCC  
MG097876.1 TTCTAACAAT TGGATTGAGT CTAGTGGCAT CTGTGGAGTT ACCAAATTCC

.....|.....|.....|.....|.....|.....|.....|.....|.....|.....|  
3810 3820 3830 3840 3850

MZ291446.1 TTGGAGGAGC TGGGGGATGG ACTTGCAATG GGCATTATGA TCTTAAAATT  
MG097876.1 TTGGAGGAGC TGGGGGATGG ACTTGCAATG GGCATTATGA TCTTAAAATT

.....|.....|.....|.....|.....|.....|.....|.....|.....|.....|  
3860 3870 3880 3890 3900

MZ291446.1 ATTGACTGAC TTTCAATCAC ATCAGCTGTG GGCTACCTTG CTGTCCTTGA  
MG097876.1 ATTGACTGAC TTTCAATCAC ATCAGCTGTG GGCTACCTTG CTGTCCTTGA

.....|.....|.....|.....|.....|.....|.....|.....|.....|.....|  
3910 3920 3930 3940 3950

MZ291446.1 CATTTATCAA AACAACGTTT TCCTTGCACT GTGCATGGAA GACTATGGCT  
MG097876.1 CATTTATCAA AACAACGTTT TCCTTGCACT ATGCATGGAA GACAATGGCT

.....|.....|.....|.....|.....|.....|.....|.....|.....|.....|  
3960 3970 3980 3990 4000

MZ291446.1 ATGGTACTGT CAATTGTATC TCTCTTCCCC TTATGCCTGT CCACGACCTC  
MG097876.1 ATGGTATTGT CAATTGTATC TCTCTTCCCC TTATGCCTGT CCACGACCTC

.....|.....|.....|.....|.....|.....|.....|.....|.....|.....|  
4010 4020 4030 4040 4050

MZ291446.1 CCAAAAAACA ACATGGCTTC CGGTGCTGTT GGGATCTCTT GGATGCAAAC  
MG097876.1 CCAAAAAACA ACATGGCTTC CAGTGCTGTT GGGATCTCTT GGATGCAAAC

.....|.....|.....|.....|.....|.....|.....|.....|.....|.....|  
4060 4070 4080 4090 4100

MZ291446.1 CACTAACCAT GTTTCTTATA GCAGAAAACA AAATCTGGGG AAGGAAAAGT  
MG097876.1 CACTAACCAT GTTTCTTATA GCAGAAAACA AAATTTGGGG AAGGAAAAGT

.....|.....|.....|.....|.....|.....|.....|.....|.....|.....|  
4110 4120 4130 4140 4150

MZ291446.1 TGGCCCCTCA ATGAAGGAAT CATGGCTGTT GGAATAGTCA GTATCCTACT  
MG097876.1 TGGCCCCTCA ATGAAGGAAT CATGGCTGTT GGAATAGTCA GCATCCTACT

.....|.....|.....|.....|.....|.....|.....|.....|.....|.....|  
4160 4170 4180 4190 4200

MZ291446.1 AAGTTCACCTC CTCAAAAATG ATGTGCCGCT AGCTGGGCCA TTGATAGCTG  
MG097876.1 AAGTTCATTC CTCAAAAATG ATGTGCCGCT AGCTGGGCCA TTGATAGCTG

.....|.....|.....|.....|.....|.....|.....|.....|.....|.....|  
4210 4220 4230 4240 4250

MZ291446.1 GAGGCATGCT AATAGCATGT TATGTCATAT CTGGAAGCTC AGCCGATCTA  
MG097876.1 GAGGCATGCT AATAGCATGT TATGTCATAT CTGGAAGCTC AGCCGATCTA

.....|.....|.....|.....|.....|.....|.....|.....|.....|.....|  
42604270428042904300

MZ291446.1TCACTAGAGA AAGCGGCTGA GGTCTCCTGG GAAAAAGAAG CAGAACACTC  
MG097876.1TCACTAGAGA AAGCGGCTGA GGTCTCCTGG GAAGAAGAAG CAGAACACTC

.....|.....|.....|.....|.....|.....|.....|.....|.....|.....|  
43104320433043404350

MZ291446.1TGGTGCCTCA CACAACATAT TAGTGGAGGT CCAAGATGAT GGAACCATGA  
MG097876.1TGGTGCCTCA CACAACATAT TAGTGGAGGT CCAAGATGAT GGAACCATGA

.....|.....|.....|.....|.....|.....|.....|.....|.....|.....|  
43604370438043904400

MZ291446.1AGATAAAGGA TGAAGAGAGA GATGACACGC TAACCATTCT CCTTAAAGCA  
MG097876.1AGATAAAGGA TGAAGAGAGA GATGACACGC TAACCATTCT CCTTAAAGCA

.....|.....|.....|.....|.....|.....|.....|.....|.....|.....|  
44104420443044404450

MZ291446.1ACTCTGCTAG CAATTTTCAGG GGTGTACCCA TTGTCAATAC CAGCGACCCT  
MG097876.1ACTCTGCTAG CAGTTTCAGG GGTGTACCCA TTATCAATAC CAGCGACCCT

.....|.....|.....|.....|.....|.....|.....|.....|.....|.....|  
44604470448044904500

MZ291446.1TTTTGTGTGG TACTTTTGGC AGAAAAAGAA ACAGAGATCT GGAGTGTTAT  
MG097876.1TTTTGTGTGG TACTTTTGGC AGAAAAAGAA ACAGAGATCT GGAGTGTTAT

.....|.....|.....|.....|.....|.....|.....|.....|.....|.....|  
45104520453045404550

MZ291446.1GGGACACACC CAGCCCTCCA GAAGTGGAAA GAGCAGTTCT TGATGATGGC  
MG097876.1GGGACACACC TAGCCCTCCA GAAGTGGAAA GAGCAGTTCT TGATGATGGC

.....|.....|.....|.....|.....|.....|.....|.....|.....|.....|  
45604570458045904600

MZ291446.1ATCTATAGAA TCATGCAGAG AGGACTGTTG GGCAGGTCTC AAGTGGGGGT  
MG097876.1ATCTATAGAA TCATGCAGAG AGGACTGTTG GGCAGGTCCC AAGTGGGGGT

.....|.....|.....|.....|.....|.....|.....|.....|.....|.....|  
46104620463046404650

MZ291446.1AGGAGTGTTT CAAGGAAACG TGTTCACAC AATGTGGCAT GTCACCAGGG  
MG097876.1AGGAGTGTTT CAAGGAAACG TGTTCACAC AATGTGGCAT GTCACCAGGG

.....|.....|.....|.....|.....|.....|.....|.....|.....|.....|  
46604670468046904700

MZ291446.1GAGCTGTACT CATGTACCAA GGAAGAGAC TGGAACCGAG CTGGGCCAGT  
MG097876.1GAGCTGTACT CATGTATCAA GGAAGAGAC TGGAACCGAG CTGGGCCAGT

.....|.....|.....|.....|.....|.....|.....|.....|.....|.....|  
47104720473047404750

MZ291446.1GTCAAAAAAG ACCTGATCTC ATATGGAGGA GGTGGAGGC TTCAAGGATC  
MG097876.1GTCAAAAAAG ACCTAATCTC ATATGGAGGA GGTGGAGGC TTCAAGGATC

.....|.....|.....|.....|.....|.....|.....|.....|.....|.....|  
47604770478047904800

MZ291446.1CTGGAACACG GGAGAAGAAG TGCAGGTGAT TGCTGTTGAA CCAGGGAAAA  
MG097876.1CTGGAACACG GGAGAAGAAG TGCAGGTGAT TGCTGTTGAA CCAGGGAAAA

.....|.....|.....|.....|.....|.....|.....|.....|.....|.....|  
48104820483048404850

MZ291446.1ACCCCAAAAA TGTACAAACA GCGCCGGGCA CTTTTAAGAC CCCTGAAGGC  
MG097876.1ACCCCAAAAA TGTACAAACA GCGCCGGGCA CCTTTAAGAC CCCTGAAGGC



.....|.....| .....|.....| .....|.....| .....|.....| .....|.....|  
4860 4870 4880 4890 4900  
**MZ291446.1** GAAGTTGGAG CTATTGCCCT AGATTTTAAA CCCGGCACAT CTGGATCTCC  
**MG097876.1** GAAGTTGGAG CCATTGCCCT AGATTTTAAA CCCGGCACAT CTGGATCTCC

.....|.....| .....|.....| .....|.....| .....|.....| .....|.....|  
4910 4920 4930 4940 4950  
**MZ291446.1** CATCGTGAAC AGAGAAGGGA AAATAGTAGG TCTTTATGGA AATGGAGTGG  
**MG097876.1** CATCGTGAAC AGAGAAGGGA AAATAGTAGG TCTTTATGGA AATGGAGTAG

.....|.....| .....|.....| .....|.....| .....|.....| .....|.....|  
4960 4970 4980 4990 5000  
**MZ291446.1** TGACAACAAG TGGAACCTAC GTCAGTGCCA TAGCTCAAGC TAAAGCATCA  
**MG097876.1** TGACAACAAG TGGAACCTAC GTCAGTGCCA TAGCTCAAGC CAAAGCATCA

.....|.....| .....|.....| .....|.....| .....|.....| .....|.....|  
5010 5020 5030 5040 5050  
**MZ291446.1** CAAGAGGGGC CCCTACCAGA GATTGAAGAT GAGGTGTTTA GGAAAAGAAA  
**MG097876.1** CAAGAAGGGC CCCTACCAGA GATTGAAGAC GAGGTGTTTA AGAAAAGAAA

.....|.....| .....|.....| .....|.....| .....|.....| .....|.....|  
5060 5070 5080 5090 5100  
**MZ291446.1** CTTAACAATA ATGGATCTGC ATCCAGGATC GGGAAAAACA AGAAGATACC  
**MG097876.1** CTTAACAATA ATGGACCTGC ATCCAGGATC GGGAAAAACA AGAAGATACC

.....|.....| .....|.....| .....|.....| .....|.....| .....|.....|  
5110 5120 5130 5140 5150  
**MZ291446.1** TACCAGCCAT AGTCCGTGAG GCCATAAAAA GGAAGCTGCG CACACTAATT  
**MG097876.1** TTCCGGCCAT AGTCCGTGAG GCCATAAAAA GGAAGCTGCG CACATTAATT

.....|.....| .....|.....| .....|.....| .....|.....| .....|.....|  
5160 5170 5180 5190 5200  
**MZ291446.1** CTGGCTCCCA CAAGGGTTGT CGCTCCGAA ATGGCAGAGG CGCTCAAGGG  
**MG097876.1** CTGGCCCCCA CAAGGGTTGT CGCTCCGAA ATGGCAGAGG CGCTCAAGGG

.....|.....| .....|.....| .....|.....| .....|.....| .....|.....|  
5210 5220 5230 5240 5250  
**MZ291446.1** AATGCCAATA AGGTACCAAA CAACAGCAGT GAAGAGTGAA CACACAGGAA  
**MG097876.1** AATGCCAATA AGGTACCAAA CAACAGCAGT GAAGAGTGAA CACACAGGAA

.....|.....| .....|.....| .....|.....| .....|.....| .....|.....|  
5260 5270 5280 5290 5300  
**MZ291446.1** AAGAGATAGT TGACCTCATG TGTCACGCCA CCTTCACTAT GCGCCTCCTG  
**MG097876.1** AAGAGATAGT TGACCTCATG TGTCACGCCA CTTTCACCAT GCGCCTCCTG

.....|.....| .....|.....| .....|.....| .....|.....| .....|.....|  
5310 5320 5330 5340 5350  
**MZ291446.1** TCTCCCGTGA GAGTTCCCAA TTATAACATG ATTATTATGG ATGAAGCACA  
**MG097876.1** TCTCCCGTGA GAGTTCCCAA TTACAACATG ATTATCATGG ATGAAGCACA

.....|.....| .....|.....| .....|.....| .....|.....| .....|.....|  
5360 5370 5380 5390 5400  
**MZ291446.1** TTTCACCGAT CCATCCAGCA TAGCGGCTAG AGGGTACATC TCAACCCGAG  
**MG097876.1** TTTCACCGAT CCATCCAGCA TAGCGGCTAG AGGGTACATC TCAACCCGAG

.....|.....| .....|.....| .....|.....| .....|.....| .....|.....|  
5410 5420 5430 5440 5450  
**MZ291446.1** TGGGCATGGG TGAAGCAGCT GCGATTTTCA TGACAGCCAC TCCCCCAGGA  
**MG097876.1** TGGGCATGGG TGAAGCAGCT GCGATCTTCA TGACAGCCAC TCCCCCAGGA

.....|.....|.....|.....|.....|.....|.....|.....|.....|.....|  
54605470548054905500  
MZ291446.1TCAGTGGAGG CCTTTCCACA GAGCAACGCA GTTATCCAAG ATGAGGAAAG  
MG097876.1TCAGTGGAGG CCTTTCCACA GAGCAACGCA GTTATCCAAG ATGAGGAAAG

.....|.....|.....|.....|.....|.....|.....|.....|.....|.....|  
55105520553055405550  
MZ291446.1AGATATTTCCT GAGAGATCAT GGAACTCAGG TTATGAGTGG ATCACTGACT  
MG097876.1AGACATTTCCT GAGAGATCAT GGAATTCAGG TTATGAGTGG ATCACTGACT

.....|.....|.....|.....|.....|.....|.....|.....|.....|.....|  
55605570558055905600  
MZ291446.1TCCCAGGCAA AACAGTTTGG TTTGTCCCAA GCATTAAATC AGGAAATGAT  
MG097876.1TCCCAGGCAA AACAGTTTGG TTTGTTCCAA GCATTAAATC AGGAAATGAT

.....|.....|.....|.....|.....|.....|.....|.....|.....|.....|  
56105620563056405650  
MZ291446.1ATTGCCAACT GCTTAAGAAA GAATGGGAAA CGAGTGATTC AATTGAGCAG  
MG097876.1ATTGCCAACT GCTTAAGAAA GAATGGGAAA CGGGTGATTC AATTGAGCAG

.....|.....|.....|.....|.....|.....|.....|.....|.....|.....|  
56605670568056905700  
MZ291446.1AAAAACCTTT GACACAGAGT ACCAAAAAAC AAAAAATAAC GACTGGGACT  
MG097876.1GAAAACCTTT GACACAGAGT ACCAAAAAAC AAAAAATAAC GACTGGGACT

.....|.....|.....|.....|.....|.....|.....|.....|.....|.....|  
57105720573057405750  
MZ291446.1ACGTCGTCAC AACAGACATC TCCGAAATGG GAGCAAATTT CCGGGCCGAC  
MG097876.1ACGTCGTCAC AACAGACATC TCCGAAATGG GAGCAAATTT CCGGGCCGAC

.....|.....|.....|.....|.....|.....|.....|.....|.....|.....|  
57605770578057905800  
MZ291446.1AGGGTGATAG ACCCAAGACG GTGTCTGAAA CCGGTAATAC TAAAAGATGG  
MG097876.1AGGGTGATAG ACCCAAGACG GTGTCTGAAA CCGGTAATAC TAAAAGATGG

.....|.....|.....|.....|.....|.....|.....|.....|.....|.....|  
58105820583058405850  
MZ291446.1TCCAGAGCGT GTCATCTTAG CAGGACCGAT GCCAGTGACT GTGGCTAGTG  
MG097876.1TCCAGAGCGT GTCATTTTAG CAGGACCGAT GCCAGTGACT GTGGCCAGTG

.....|.....|.....|.....|.....|.....|.....|.....|.....|.....|  
58605870588058905900  
MZ291446.1CCGCCCCAAG GAGAGGAAGA ATTGGAAGGA ACCACAACAA GGAAGGTGAT  
MG097876.1CCGCCCAGAG GAGAGGAAGA ATTGGAAGGA ACCACAATAA GGAAGGTGAT

.....|.....|.....|.....|.....|.....|.....|.....|.....|.....|  
59105920593059405950  
MZ291446.1CAGTACATCT ATATGGGACA GCCTTTAAAC AACGATGAAG ATCACGCTCA  
MG097876.1CAGTACATCT ATATGGGACA GCCTTTAAAC AACGATGAAG ATCACGCTCA

.....|.....|.....|.....|.....|.....|.....|.....|.....|.....|  
59605970598059906000  
MZ291446.1CTGGACGGAA GCAAAAATGC TCCTTGATAA TATAAACACA CCAGAAGGAA  
MG097876.1CTGGACGGAA GCAAAAATGC TACTTGATAA TATAAACACA CCAGAAGGAA

.....|.....|.....|.....|.....|.....|.....|.....|.....|.....|  
60106020603060406050  
MZ291446.1TTATCCCAGC CCTCTTCGAG CCGGAGAGAG AAAAGAGTGC GGCAATAGAC  
MG097876.1TTATCCCAGC TCTCTTCGAG CCAGAGAGAG AAAAGAGTGC GGCAATAGAC

.....|.....|.....|.....|.....|.....|.....|.....|.....|.....|

|            |             |             |             |             |             |
|------------|-------------|-------------|-------------|-------------|-------------|
|            | 6060        | 6070        | 6080        | 6090        | 6100        |
| MZ291446.1 | GGGGAATACA  | GACTGCGGGG  | TGAAGCAAGG  | AAAACGTTTG  | TGGAGCTCAT  |
| MG097876.1 | GGGGAATACA  | GACTGCGAGG  | TGAAGCAAGG  | AAAACGTTTG  | TGGAGCTCAT  |
|            | ..... ..... | ..... ..... | ..... ..... | ..... ..... | ..... ..... |
|            | 6110        | 6120        | 6130        | 6140        | 6150        |
| MZ291446.1 | GAGAAGAGGA  | GATCTACCTG  | TCTGGCTATC  | TTACAAAAGTT | GCCTCAGAAG  |
| MG097876.1 | GAGAAGAGGA  | GATCTACCTG  | TATGGCTATC  | CTACAAAAGTT | GCCTCAGAAG  |
|            | ..... ..... | ..... ..... | ..... ..... | ..... ..... | ..... ..... |
|            | 6160        | 6170        | 6180        | 6190        | 6200        |
| MZ291446.1 | GCTTCCAATA  | CTCTGACAGA  | AGATGGTGCT  | TTGACGGGGA  | AAGGAACAAC  |
| MG097876.1 | GCTTCCAGTA  | CTCTGATAGA  | AGATGGTGCT  | TTGACGGGGA  | AAGGAACAAC  |
|            | ..... ..... | ..... ..... | ..... ..... | ..... ..... | ..... ..... |
|            | 6210        | 6220        | 6230        | 6240        | 6250        |
| MZ291446.1 | CAGGTGTTGG  | AAGAGAACAT  | GGACGTGGAG  | ATCTGGACAA  | AAGAAGGAGA  |
| MG097876.1 | CAGGTGTTGG  | AGGAGAACAT  | GGACGTGGAG  | ATCTGGACGA  | AAGAAGGAGA  |
|            | ..... ..... | ..... ..... | ..... ..... | ..... ..... | ..... ..... |
|            | 6260        | 6270        | 6280        | 6290        | 6300        |
| MZ291446.1 | AAGGAAGAAA  | CTACGACCCC  | GCTGGCTGGA  | CGCCAGAACA  | TACTCAGACC  |
| MG097876.1 | AAGAAAGAAA  | CTACGACCCC  | GCTGGCTGGA  | TGCCAGAACA  | TACTCAGACC  |
|            | ..... ..... | ..... ..... | ..... ..... | ..... ..... | ..... ..... |
|            | 6310        | 6320        | 6330        | 6340        | 6350        |
| MZ291446.1 | CACTGGCCCT  | GCGCGAGTTT  | AAAGAGTTTG  | CAGCAGGAAG  | AAGAAGCGTC  |
| MG097876.1 | CACTGGCCCT  | GCGCGAGTTT  | AAAGAGTTTG  | CAGCAGGAAG  | AAGAAGCGTC  |
|            | ..... ..... | ..... ..... | ..... ..... | ..... ..... | ..... ..... |
|            | 6360        | 6370        | 6380        | 6390        | 6400        |
| MZ291446.1 | TCAGGTGATC  | TAATATTGGA  | AATAGGGAAA  | CTTCCACAAC  | ACTTGACGCA  |
| MG097876.1 | TCAGGTGATC  | TAATATTGGA  | AATAGGGAAA  | CTTCCACAAC  | ACTTGACGCA  |
|            | ..... ..... | ..... ..... | ..... ..... | ..... ..... | ..... ..... |
|            | 6410        | 6420        | 6430        | 6440        | 6450        |
| MZ291446.1 | AAGGGCCCAG  | AATGCCTTGG  | ATAACCTGGT  | CATGTTGCAC  | AACTCCGAAC  |
| MG097876.1 | AAGGGCCCAG  | AATGCCTTGG  | ACAACCTGGT  | TATGTTGCAC  | AACTCCGAAC  |
|            | ..... ..... | ..... ..... | ..... ..... | ..... ..... | ..... ..... |
|            | 6460        | 6470        | 6480        | 6490        | 6500        |
| MZ291446.1 | AAGGAGGAAG  | AGCCTATAGA  | CATGCAATGG  | AAGAACTGCC  | AGACACCATA  |
| MG097876.1 | AAGGAGGAAG  | AGCCTATAGA  | CATGCAATGG  | AAGAACTGCC  | AGACACCATA  |
|            | ..... ..... | ..... ..... | ..... ..... | ..... ..... | ..... ..... |
|            | 6510        | 6520        | 6530        | 6540        | 6550        |
| MZ291446.1 | GAAACGTTAA  | TGCTCCTAGC  | TTTGATAGCT  | GTGTTAAGTG  | GTGGAGTGAC  |
| MG097876.1 | GAAACGTTGA  | TGCTCCTAGC  | TTTGATAGCT  | GTGTTAAGTG  | GTGGAATGAC  |
|            | ..... ..... | ..... ..... | ..... ..... | ..... ..... | ..... ..... |
|            | 6560        | 6570        | 6580        | 6590        | 6600        |
| MZ291446.1 | GCTGTTCTTC  | CTATCAGGAA  | GAGGCTTAGG  | GAAAACATCT  | ATCGGCCTAC  |
| MG097876.1 | GCTGTTCTTC  | CTATCAGGAA  | GGGGCTTAGG  | GAAAACATCT  | ATCGGCCTAC  |
|            | ..... ..... | ..... ..... | ..... ..... | ..... ..... | ..... ..... |
|            | 6610        | 6620        | 6630        | 6640        | 6650        |
| MZ291446.1 | TCTGCGTGAT  | GGCTTCAAGC  | GTATTGCTAT  | GGATGGCCAG  | TGTAGAGCCC  |
| MG097876.1 | TCTGCGTGAT  | GGCTTCAAGC  | GTAATGCTAT  | GGATGGCCAG  | TGTAGAGCCC  |
|            | ..... ..... | ..... ..... | ..... ..... | ..... ..... | ..... ..... |
|            | 6660        | 6670        | 6680        | 6690        | 6700        |

MZ291446.1

MG097876.1

CATTGGATAG CCGCCTCCAT CATACTGGAG TTCTTCCTGA TGGTGCTGCT  
CATTGGATAG CGGCCTCCAT CATACTGGAA TTCTTCCTGA TGGTGCTGCT

67106720673067406750

MZ291446.1

MG097876.1

CATTCCAGAG CCAGACAGAC AACGCACTCC GCAGGACAAT CAGCTGGCAT  
TATTCCAGAG CCAGACAGAC AACGCACTCC GCAGGACAAC CAGTTGGCAT

67606770678067906800

MZ291446.1

MG097876.1

ATGTGGTGAT AGGTTTGTTA TTCATGATAC TAACAGTAGC AGCCAATGAG  
ATGTGGTGAT AGGTTTGTTA TTCATGATAC TGACAGTAGC AGCCAATGAG

68106820683068406850

MZ291446.1

MG097876.1

ATGGGACTGC TGGAAACCAC AAAGAAAGAC TTAGGGATTG GCCATGTGGC  
ATGGGATTGC TGGAAACCAC AAAGAAAGAC TTAGGGATTG GCCATGTGGC

68606870688068906900

MZ291446.1

MG097876.1

TGTTGAAAAC CACCACCATG CCACAATGCT GGACGTAGAC TTACATCCAG  
TGTTGAAAAT CACCACCATG CCACAATGCT GGACGTAGAC TTACATCCAG

69106920693069406950

MZ291446.1

MG097876.1

CTTCAGCCTG GACCCTTTAT GCAGTGGCCA CAACAATCAT CACTCCCATG  
CTTCAGCCTG GACCCCTCTAT GCAGTGGCCA CAACAATTAT CACTCCCATG

69606970698069907000

MZ291446.1

MG097876.1

ATGAGGCACA CAATCGAAAA CACAACAGCA AACATTTCCT TGACAGCCAT  
ATGAGGCACA CAATCGAAAA CACAACAGCA AACATTTCCT TGACAGCCAT

70107020703070407050

MZ291446.1

MG097876.1

TGCAAATCAG GCAGCTATAT TGATGGGACT TGACAAAGGA TGGCCAATAT  
TGCAAACCAG GCAGCTATAT TGATGGGACT TGACAAAGGA TGGCCAATAT

70607070708070907100

MZ291446.1

MG097876.1

CGAAGATGGA CATAGGAGTT CCACTTCTCG CCTTGGGGTG CTATTCCCAG  
CGAAGATGGA CATAGGAGTT CCACTTCTCG CCTTGGGGTG CTATTCCCAG

71107120713071407150

MZ291446.1

MG097876.1

GTGAATCCAC TGACGCTGAC AGCGGCGGTA TTGATGCTAG TGGCCCACTA  
GTGAATCCAC TGACGCTGAC AGCGGCGGTA TTGATGCTAG TGGCCCATTA

71607170718071907200

MZ291446.1

MG097876.1

CGCTATAATT GGACCTGGAC TGCAAGCAAA AGCTACTAGA GAAGCTCAAA  
CGCTATAATT GGACCTGGAC TGCAAGCAAA AGCTACTAGA GAAGCTCAAA

72107220723072407250

MZ291446.1

MG097876.1

AAAGGACAGC GGCCGGAATA ATGAAAAATC CAACTGTTGA TGGGAATCGTT  
AAAGGACAGC GGCCGGAATA ATGAAAAATC CAACCGTTGA TGGGAATCGTT

72607270728072907300

MZ291446.1

GCAATAGACC TGGACCCTGT GGTTTATGAT GCGAAATTTG AGAAACAAC

MG097876.1 GCAATAGATT TGGACCCTGT GGTTTATGAT GCGAAATTTG AGAAACAAC

.....|.....|.....|.....|.....|.....|.....|.....|.....|.....|  
7310 7320 7330 7340 7350

MZ291446.1 AGGCCAAATA ATGTTGCTGA TACTATGCAC ATCACAGATT CTCTTGATGC  
MG097876.1 AGGCCAAATA ATGCTGTTGA TACTATGCAC ATCACAGATC CTCTTGATGC

.....|.....|.....|.....|.....|.....|.....|.....|.....|.....|  
7360 7370 7380 7390 7400

MZ291446.1 GGACTACATG GGCCTTGTGC GAATCCATCA CACTGGCCAC TGGACCTCTG  
MG097876.1 GGACTACATG GGCCTTGTGC GAATCCATTA CACTGGCCAC TGGACCTCTG

.....|.....|.....|.....|.....|.....|.....|.....|.....|.....|  
7410 7420 7430 7440 7450

MZ291446.1 ACCACGCTCT GGGAGGGATC TCCAGGAAAA TTTTGGAAACA CCACGATAGC  
MG097876.1 ACCACGCTCT GGGAGGGATC TCCAGGAAAA TTTTGGAAACA CCACGATAGC

.....|.....|.....|.....|.....|.....|.....|.....|.....|.....|  
7460 7470 7480 7490 7500

MZ291446.1 AGTTTCCATG GCAAACATTT TCAGAGGAAG TTATCTAGCA GGAGCAGGTC  
MG097876.1 AGTTTCCATG GCAAACATTT TCAGAGGAAG TTATCTAGCA GGAGCAGGTC

.....|.....|.....|.....|.....|.....|.....|.....|.....|.....|  
7510 7520 7530 7540 7550

MZ291446.1 TGGCTTTCTC ATTAATGAAA TCTCTAGGAG GAGGTAGGAG AGGCACGGGA  
MG097876.1 TGGCCTTCTC ATTAATGAAA TCTCTAGGAG GAGGCAGGAG AGGCACGGGA

.....|.....|.....|.....|.....|.....|.....|.....|.....|.....|  
7560 7570 7580 7590 7600

MZ291446.1 GCCCAAGGGG AAACACTGGG AGAGAAATGG AAAAGACAGC TGAACCAACT  
MG097876.1 GCCCAAGGGG AAACACTGGG AGAGAAATGG AAAAGACAGC TGAACCAACT

.....|.....|.....|.....|.....|.....|.....|.....|.....|.....|  
7610 7620 7630 7640 7650

MZ291446.1 GAGCAAGTCA GAATTCAACA CCTATAAAAG GAGTGGGATT ATGGAAGTGG  
MG097876.1 GAGCAAGTCA GAATTCAACA CCTATAAAAG GAGTGGGATT ATGGAAGTGG

.....|.....|.....|.....|.....|.....|.....|.....|.....|.....|  
7660 7670 7680 7690 7700

MZ291446.1 ACAGATCCGA AGCCAAAGAG GGAAGTGA AAAAGAGAAAC AACCAAACAT  
MG097876.1 ACAGATCCGA AGCCAAAGAG GGAAGTGA AAAAGAGAAAC AACCAAACAT

.....|.....|.....|.....|.....|.....|.....|.....|.....|.....|  
7710 7720 7730 7740 7750

MZ291446.1 GCAGTGTCTG GAGGAACCGC TAAATTGAGG TGGTTTGTGG AGAGGAACCT  
MG097876.1 GCAGTGTCTG GAGGAACCGC TAAATTGAGG TGGTTTGTGG AGAGGAACCT

.....|.....|.....|.....|.....|.....|.....|.....|.....|.....|  
7760 7770 7780 7790 7800

MZ291446.1 CGTGAAACCA GAAGGGAAAG TCATAGACCT CGGTGTGTGGA AGAGGTGGCT  
MG097876.1 TGTGAAACCA GAAGGGAAAG TCATAGACCT CGGTGTGTGGA AGAGGTGGCT

.....|.....|.....|.....|.....|.....|.....|.....|.....|.....|  
7810 7820 7830 7840 7850

MZ291446.1 GGTCTACTTA TTGCGCTGGG CTGAAGAAAG TCACAGAGGT GAAGGGATAC  
MG097876.1 GGTCTACTTA TTGCGCTGGG CTGAAGAAAG TCACAGAAAGT GAAGGGATAC

.....|.....|.....|.....|.....|.....|.....|.....|.....|.....|  
7860 7870 7880 7890 7900

MZ291446.1 ACAAAGGAG GACCTGGACA CGAAGAACCA ATCCCAATGG CGACCTATGG  
MG097876.1 ACAAAGGAG GACCTGGACA CGAAGAACCA ATCCCAATGG CGACCTATGG

.....|.....|.....|.....|.....|.....|.....|.....|.....|.....|  
79107920793079407950

MZ291446.1ATGGAACCTA GTAAAGCTGT ACTCCGGGAA AGACGTGTTC TTTATACCAC  
MG097876.1ATGGAACCTA GTAAAGCTGT ACTCCGGGAA AGATGTATTC TTTATGCCAC

.....|.....|.....|.....|.....|.....|.....|.....|.....|.....|  
79607970798079908000

MZ291446.1CTGAGAAATG TGACACCCTC TTGTGTGATA TTGGTGAGTC CTCTCCAAAC  
MG097876.1ATGAGAAGTG TGACACCCTT TTATGTGATA TTGGTGAGTC CTCTCCAAAC

.....|.....|.....|.....|.....|.....|.....|.....|.....|.....|  
80108020803080408050

MZ291446.1CCAACTATAG AGGAAGGAAG AACGCTACGC GTCCTAAAGA TGGTGGAACC  
MG097876.1CCAACTATAG AGGAAGGAAG AACGCTACGC GTCCTAAAGA TGGTGGAACC

.....|.....|.....|.....|.....|.....|.....|.....|.....|.....|  
80608070808080908100

MZ291446.1ATGGCTCAGA GGAAACCAAT TTTGCATAAA AATTCTGAAT CCCTACATGC  
MG097876.1ATGGCTCAGA GGAAACCAAT TTTGCATAAA AGTTCTGAAT CCCTACATGC

.....|.....|.....|.....|.....|.....|.....|.....|.....|.....|  
81108120813081408150

MZ291446.1CAAGTGTTGGT GGAAACTCTG GAGCAAATGC AAAGAAAACA CGGAGGAATG  
MG097876.1CAAGTGTTGGT GGAAACTCTG GAGCAAATGC AGAGAAAACA TGGAGGAATG

.....|.....|.....|.....|.....|.....|.....|.....|.....|.....|  
81608170818081908200

MZ291446.1CTGGTGC GAA ATCCACTTTC AAGGAATTCC ACTCATGAAA TGTATTGGGT  
MG097876.1CTAGTGC GAA ATCCACTTTC AAGGAATTCT ACTCATGAAA TGTATTGGGT

.....|.....|.....|.....|.....|.....|.....|.....|.....|.....|  
82108220823082408250

MZ291446.1TTCATGTGGA ACAGGAAACA TTGTGTCAGC AGTAAACATG ACATCCAGAA  
MG097876.1TTCATGTGGA ACAGGAAACA TTGTGTCAGC AGTAAACATG ACATCCAGAA

.....|.....|.....|.....|.....|.....|.....|.....|.....|.....|  
82608270828082908300

MZ291446.1TGTTGCTAAA TCGGTTTACA ATGGCTCATA GGAAACCAAC ATACGAAAGA  
MG097876.1TGTTGCTAAA TCGATTTACA ATGGCTCATA GGAAACCAAC ATATGAAAGA

.....|.....|.....|.....|.....|.....|.....|.....|.....|.....|  
83108320833083408350

MZ291446.1GACGTGGACC TAGGCGCCGG AACAAAGACAT GTGGCAGTAG AACCAGAGGT  
MG097876.1GACGTGGACC TAGGCGCCGG AACAAAGACAT GTGGCAGTGG AACCAGAGGT

.....|.....|.....|.....|.....|.....|.....|.....|.....|.....|  
83608370838083908400

MZ291446.1AGCTAACCTA GATATCATTG GCCAGAGGAT AGAGAACATA AAACATGAAC  
MG097876.1AGCCAACCTA GATATTATTG GCCAGAGGAT AGAGAACATA AAACATGAAC

.....|.....|.....|.....|.....|.....|.....|.....|.....|.....|  
84108420843084408450

MZ291446.1ACAAGTCAAC ATGGCATTAT GATGAGGACA ATCCATATAA AACATGGGCC  
MG097876.1ACAAGTCAAC ATGGCATTAT GATGAGGACA ATCCATATAA AACATGGGCC

.....|.....|.....|.....|.....|.....|.....|.....|.....|.....|  
84608470848084908500

MZ291446.1TATCATGGAT CATATGAGGT CAAACCATCA GGATCAGCCT CATCCATGGT  
MG097876.1TATCATGGAT CATATGAGGT CAAGCCATCA GGATCAGCCT CATCCATGGT

.....|.....|.....|.....|.....|.....|.....|.....|.....|.....|  
85108520853085408550  
MZ291446.1CAATGGTGTG GTGAAACTGC TCACCAAACC ATGGGATGTC ATCCCCATGG  
MG097876.1CAATGGTGTG GTGAAACTGC TCACCAAACC ATGGGATGTC ATCCCCATGG

.....|.....|.....|.....|.....|.....|.....|.....|.....|.....|  
85608570858085908600  
MZ291446.1TCACACAAAT AGCTATGACT GACACTACAC CCTTTGGACA ACAGAGGGTA  
MG097876.1TCACACAAAT AGCCATGACT GACACTACAC CCTTTGGACA ACAGAGGGTG

.....|.....|.....|.....|.....|.....|.....|.....|.....|.....|  
86108620863086408650  
MZ291446.1TTTAAAGAGA AAGTTGACAC ACGCACACCA AAAGCAAAAC GAGGCACAGC  
MG097876.1TTTAAAGAGA AAGTTGACAC ACGCACACCA AAAGCAAAAC GAGGCACAGC

.....|.....|.....|.....|.....|.....|.....|.....|.....|.....|  
86608670868086908700  
MZ291446.1ACAAATCATG GAGGTGACAG CCAGGTGGTT ATGGGGTTTT CTTTCTAGAA  
MG097876.1ACAAATCATG GAGGTGACAG CCAGGTGGTT ATGGGGTTTT CTTTCTAGAA

.....|.....|.....|.....|.....|.....|.....|.....|.....|.....|  
87108720873087408750  
MZ291446.1ACAAGAAGCC AAGAATTTGT ACAAGAGAGG AGTTCACAAG AAAAGTTAGG  
MG097876.1ACAAGAAGCC AAGAATTTGT ACAAGAGAGG AGTTCACAAG AAAAGTTAGG

.....|.....|.....|.....|.....|.....|.....|.....|.....|.....|  
87608770878087908800  
MZ291446.1TCAAACGCAG CCATCGGAGC AGTGTTTCATT GACGAAAACC AATGGAACTC  
MG097876.1TCAAACGCAG CCATCGGAGC AGTGTTTCATT GACGAAAATC AATGGAACTC

.....|.....|.....|.....|.....|.....|.....|.....|.....|.....|  
88108820883088408850  
MZ291446.1AGCAAAAGAA GCAGTGGAAG ATGAGCGGTT CTGGGACCTT GTGCACAGAG  
MG097876.1AGCAAAAGAA GCAGTGGAAG ATGAGCGGTT CTGGGACCTT GTGCACAGAG

.....|.....|.....|.....|.....|.....|.....|.....|.....|.....|  
88608870888088908900  
MZ291446.1AGAGGGAGCT TCACAAACAG GGAAAATGTG CCACGTGTGT TTACAATATG  
MG097876.1AGAGGGAGCT TCACAAACAG GGAAAATGTG CCACGTGTGT TTACAACATG

.....|.....|.....|.....|.....|.....|.....|.....|.....|.....|  
89108920893089408950  
MZ291446.1ATGGGGAAGA GAGAGAAAAA GCTAGGAGAA TTTGGAAAGG CAAAAGGAAG  
MG097876.1ATGGGGAAGA GAGAGAAAAA GCTAGGAGAA TTTGGAAAGG CAAAAGGAAG

.....|.....|.....|.....|.....|.....|.....|.....|.....|.....|  
89608970898089909000  
MZ291446.1TCGTGCAATA TGGTACATGT GGTGGGAGC ACGCTTTCTA GAGTTCGAAG  
MG097876.1TCGTGCAATA TGGTACATGT GGTGGGAGC ACGCTTTCTA GAGTTCGAAG

.....|.....|.....|.....|.....|.....|.....|.....|.....|.....|  
90109020903090409050  
MZ291446.1CTCTTGTTT CATGAACGAA GACCACTGGT TCAGCAGAGA GAATTCACTC  
MG097876.1CTCTTGTTT CATGAACGAA GACCACTGGT TCAGCAGAGA GAATTCACTC

.....|.....|.....|.....|.....|.....|.....|.....|.....|.....|  
90609070908090909100  
MZ291446.1AGCGGAGTGG AAGGAGAAGG ACTCCACAAA CTTGGATATA TACTCAGAGA  
MG097876.1AGCGGAGTGG AAGGAGAAGG ACTCCACAAA CTTGGATATA TACTCAGAGA

.....|.....|.....|.....|.....|.....|.....|.....|.....|.....|  
91109120913091409150  
MZ291446.1CATATCAAAGATTCCAGGGGGAAACATGTA CGCTGATGACACAGCCGGAT  
MG097876.1CATATCAAAGATTTCAGGGGGAAACATGTA TGCTGATGACACAGCCGGAT

.....|.....|.....|.....|.....|.....|.....|.....|.....|.....|  
91609170918091909200  
MZ291446.1GGGATACAAGGATAACAGAGGATGACCTTCAGAATGAGGC CAAAATTACT  
MG097876.1GGGATACAAGGATAACAGAGGATGACCTTCAGAATGAGGC CAAAATTACT

.....|.....|.....|.....|.....|.....|.....|.....|.....|.....|  
92109220923092409250  
MZ291446.1GACATCATGG AACCCGAACA TGCCCTACTG GCTAAGGCAA TCTTCAAGCT  
MG097876.1GACATCATGG AACCCGAACA TGCTCTACTA GCTAAGGCAA TCTTCAAGCT

.....|.....|.....|.....|.....|.....|.....|.....|.....|.....|  
92609270928092909300  
MZ291446.1AACCTACCAA AATAAAGTGG TAAGGGTACA GAGACCAGCA AAAAAATGGAA  
MG097876.1AACCTACCAA AATAAAGTGG TAAGGGTACA GAGACCAGCA AAAAAATGGAA

.....|.....|.....|.....|.....|.....|.....|.....|.....|.....|  
93109320933093409350  
MZ291446.1CCGTGATGGA TGTCATATCC AGACGTGACC AGAGAGGAAG CGGCCAGGTC  
MG097876.1CTGTGATGGA TGTCATTTCC AGACGTGACC AGAGAGGAAG TGGCCAGGTC

.....|.....|.....|.....|.....|.....|.....|.....|.....|.....|  
93609370938093909400  
MZ291446.1GGAACTTATG GCTTAAACAC TTTCACCAAC ATGGAAGCCC AGCTGATAAG  
MG097876.1GGAACTTATG GCTTAAACAC TTTCACCAAC ATGGAAGCCC AGCTGATAAG

.....|.....|.....|.....|.....|.....|.....|.....|.....|.....|  
94109420943094409450  
MZ291446.1ACAAATGGAG TCTGAGGGAA TCTTTTCACC CAGTGAATTA GAGACCCCAA  
MG097876.1ACAAATGGAG TCTGAGGGAA TCTTTTCACC TAGTGAATTA GAGACCCCAA

.....|.....|.....|.....|.....|.....|.....|.....|.....|.....|  
94609470948094909500  
MZ291446.1ATTTAGCCGA GAGAGTTCTC GACTGGTTGG AAAAAATATGG CGTCGAAAGG  
MG097876.1ATTTGGCCGA GAGAGTTCTC GACTGGCTGG AAAAAATATGG CGTCGAAAGG

.....|.....|.....|.....|.....|.....|.....|.....|.....|.....|  
95109520953095409550  
MZ291446.1CTAAAAAGAA TGGCAATCAG TGGAGATGAC TGCGTAGTGA AACCAATTGA  
MG097876.1CTAAAAAGAA TGGCAATCAG TGGAGATGAC TGCGTAGTGA AACCAATTGA

.....|.....|.....|.....|.....|.....|.....|.....|.....|.....|  
95609570958095909600  
MZ291446.1TGATAGGTTT GCAACAGCCT TAACAGCTCT GAATGATATG GGAAAAGTAA  
MG097876.1TGATAGGTTT GCAACAGCCT TAACAGCTCT GAATGATATG GGAAAAGTAA

.....|.....|.....|.....|.....|.....|.....|.....|.....|.....|  
96109620963096409650  
MZ291446.1GAAAAGATAT ACCACAATGG GAACCTCAA AAGGATGGAA TGATTGGCAA  
MG097876.1GAAAAGATAT ACCACAATGG GAACCTCAA AAGGATGGAA TGATTGGCAA

.....|.....|.....|.....|.....|.....|.....|.....|.....|.....|  
96609670968096909700  
MZ291446.1CAAGTGCCTT TTTGTTTACA CCACTTCCAC CAGCTGATTA TGAAGGATGG  
MG097876.1CAAGTGCCTT TTTGTTTACA CCACTTCCAC CAGCTGATTA TGAAGGATGG

.....|.....|.....|.....|.....|.....|.....|.....|.....|.....|



MZ291446.1

MG097876.1

9710

9720

9730

9740

9750

GAGGGAAATA

GTGGTGCCAT

GCCGCAACCA

AGATGAACTT

GTGGGTAGGG

GAGGGAAATA

GTGGTGCCAT

GCCGCAACCA

AGATGAACTT

GTGGGTAGGG

.....|.....|.....|.....|.....|.....|.....|.....|.....|.....|

97609770978097909800

MZ291446.1

MG097876.1

CTCGAGTATC

ACAAGGTGCT

GGATGGAGCC

TGAGAGAAAC

CGCATGCCTA

CTAGAGTATC

ACAAGGTGCT

GGATGGAGCC

TGAGAGAAAC

CGCATGCCTA

.....|.....|.....|.....|.....|.....|.....|.....|.....|.....|

98109820983098409850

MZ291446.1

MG097876.1

GGCAAATCAT

ATGCACAAAT

GTGGCAGCTG

ATGTACTTCC

ACAGGAGAGA

GGCAAATCAT

ATGCACAAAT

GTGGCAGCTG

ATGTACTTCC

ACAGGAGAGA

.....|.....|.....|.....|.....|.....|.....|.....|.....|.....|

98609870988098909900

MZ291446.1

MG097876.1

CCTGAGACTA

GCTGCTAACG

CCATCTGTTC

AGCCGTTCCA

GTTGATTGGG

CCTGAGACTA

GCTGCTAATG

CTATCTGTTC

AGCCGTTCCA

GTTGATTGGG

.....|.....|.....|.....|.....|.....|.....|.....|.....|.....|

99109920993099409950

MZ291446.1

MG097876.1

TCCCAACTAG

CCGCACCACC

TGGTCTATCC

ATGCCCCATCA

CCAATGGATG

TCCCAACTAG

CCGCACCACC

TGGTCGATCC

ATGCCCCATCA

CCAATGGATG

.....|.....|.....|.....|.....|.....|.....|.....|.....|.....|

996099709980999010000

MZ291446.1

MG097876.1

ACAACAGAAG

ACATGCTGTC

AGTGTGGAAT

AGAGTTTGGA

TAGAGGAAAA

ACAACAGAAG

ACATGCTGTC

AGTGTGGAAT

AGGGTTTGGA

TAGAGGAAAA

.....|.....|.....|.....|.....|.....|.....|.....|.....|.....|

1001010020100301004010050

MZ291446.1

MG097876.1

CCCATGGATG

GAGGACAAAA

CCCATATATC

CAGTTGGGAA

GATGTTCCAT

CCCATGGATG

GAGGACAAAA

CCCATATATC

CAGTTGGGAA

GATGTTCCAT

.....|.....|.....|.....|.....|.....|.....|.....|.....|.....|

1006010070100801009010100

MZ291446.1

MG097876.1

ATTTAGGGAA

AAGGGAAGAT

CAATGGTGTG

GATCCCTGAT

AGGCTTAACA

ATTTAGGGAA

AAGGGAAGAT

CAATGGTGTG

GATCCCTGAT

AGGCTTAACA

.....|.....|.....|.....|.....|.....|.....|.....|.....|.....|

1011010120101301014010150

MZ291446.1

MG097876.1

GCAAGGGCCA

CCTGGGCCAC

CAACATACAA

GTGGCCATAA

ACCAGGTGAG

GCAAGGGCCA

CCTGGGCCAC

CAACATACAA

GTGGCCATAA

ACCAAGTGAG

.....|.....|.....|.....|.....|.....|.....|.....|.....|.....|

1016010170101801019010200

MZ291446.1

MG097876.1

AAGATTAATT

GGAATGAGA

ATTATCTAGA

TTACATGACA

TCAATGAAGA

AAGACTAATT

GGAATGAGA

ATTATCTAGA

TTACATGACA

TCAATGAAGA

.....|.....|.....|.....|.....|.....|.....|.....|.....|.....|

1021010220102301024010250

MZ291446.1

MG097876.1

GATTCAAGAA

CGAGAGTGAT

CCCGAAGGGG

CACTCTGGTG

AGCCAACACA

GATTCAAGAA

CGAGAGTGAT

CCCGAAGGGG

CACTCTGGTG

AGCCAACACA

.....|.....|.....|.....|.....|.....|.....|.....|.....|.....|

1026010270102801029010300

MZ291446.1

MG097876.1

TTTACAAAAT

AAAGGAAAAT

AAGAAATCAA

ACAAGGCAAG

AAGTCAGGCC

TTTACAAAAT

AAAGGAAAAT

AAGAAATCAA

ACAAGGCAAG

AAGTCAGGCC

.....|.....|.....|.....|.....|.....|.....|.....|.....|.....|

1031010320103301034010350

MZ291446.1

MG097876.1

TGGATTAAGC CATAGTACGG TAAGAGCTAT GCTGCCTGTG AGCCCCGTCT  
GGATTAAGCC ATAGTACGGT AAGAGCTATG CTGCCTGTGA GCCCCGTCTA

MZ291446.1

MG097876.1

.....|.....| .....|.....| .....|.....| .....|.....| .....|.....|  
10360 10370 10380 10390 10400  
AAGGACGTAA AAAGAAGTCA GGCCGAAAGC CACGGTTTGA GCAAACCGTG  
AGGACGTAAA ATGAAGTCAG GCCGAAAGCC ACGGTTTGAG CAAACCGTGC

MZ291446.1

MG097876.1

.....|.....| .....|.....| .....|.....| .....|.....| .....|.....|  
10410 10420 10430 10440 10450  
CTGCCTGTAG CTCCATCGTG GGGATGTAAA AACCTGGGAG GCTGCAACCC  
TGCCTGTAGC TCCATCGTGG GGATGTAAAA ACCTGGGAGG CTGCAACCCA

MZ291446.1

MG097876.1

.....|.....| .....|.....| .....|.....| .....|.....| .....|.....|  
10460 10470 10480 10490 10500  
ATGGAAGCTG TACGCATGGG GTAGCAGACT AGTGGTTAGA GGAGACCCCT  
TGGAAGCTGT ACGCATGGGG TAGCAGACTA GTGGTTAGAG GAGACCCCTC

MZ291446.1

MG097876.1

.....|.....| .....|.....| .....|.....| .....|.....| .....|.....|  
10510 10520 10530 10540 10550  
CCCGAAACAC AACGCAGCAG CGGGGCCCAA CACCAGGGGA AGCTGTACCC  
CCGAAACACA ACGCAGCAGC GGGGCCCAAC ACCAGGGGAA GCTGTACCCT

MZ291446.1

MG097876.1

.....|.....| .....|.....| .....|.....| .....|.....| .....|.....|  
10560 10570 10580 10590 10600  
TGGTGGTAAG GACTAGAGGT TAGAGGAGAC CCCCCGCATA ACAATAAACA  
GGTGGTAAGG ACTAGAGGTT AGAGGAGACC CCCCGCATAA CAATAAACAG

MZ291446.1

MG097876.1

.....|.....| .....|..  
10610  
GCATATTGAC GCTGGGA  
CATATTGACG CTGGGA.
